# Supplementary material for: Harmonizing by reducing inter-run variability: performance evaluation of a quality assurance program for antinuclear antibody detection by indirect immunofluorescence
Source: publisher site journal article supplement (doi:10.1515/cclm-2018-0933), 2019-01-06

**Supplemental data Figure 1. Single Well Titer (SWT) of the different measurements (n=20) of the positive sample iQC (speckled and homogeneous) in the total imprecision experiment on the QUANTA-Lyser - NOVA View® system**

The SWT are expressed as z-score with a z-score of 0 corresponding to a SWT of 160 (target value), z-score of  $\pm 1$  corresponding to a SWT of 80 and 320 and z-score of  $\pm 2$  corresponding to a SWT of <80 and 640.

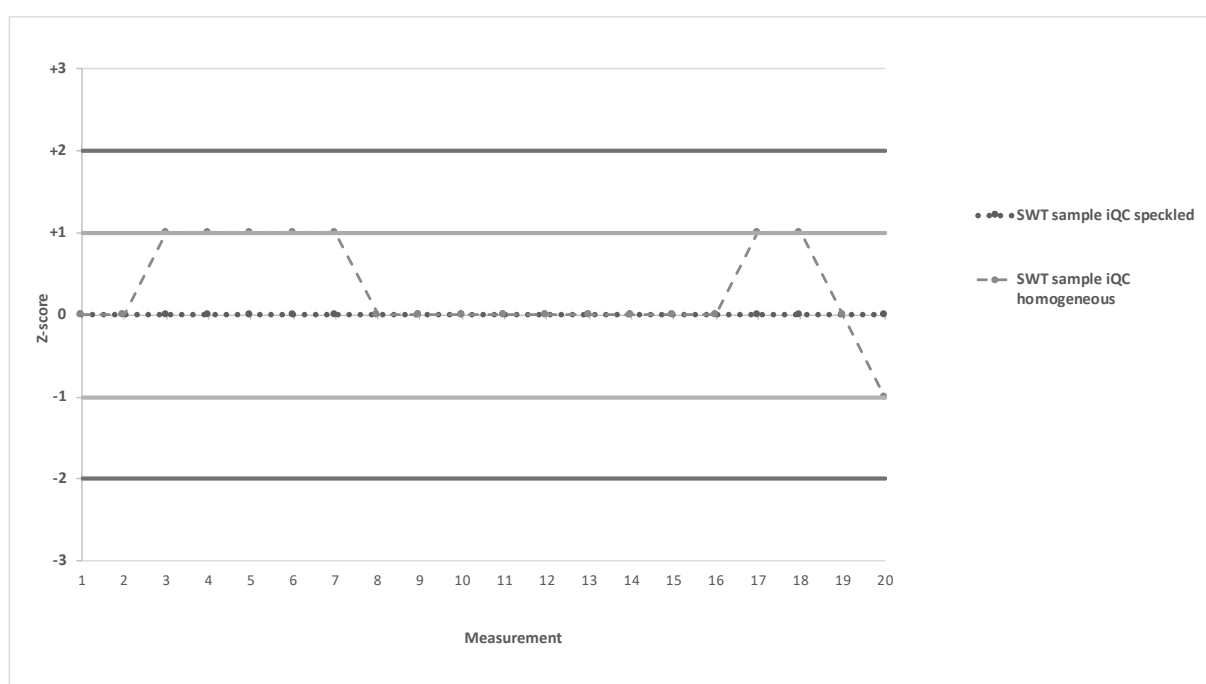

Supplement: Supplementary file 1 [file cclm-2018-0933_suppl.zip]
