# Supplementary material for: Harmonizing by reducing inter-run variability: performance evaluation of a quality assurance program for antinuclear antibody detection by indirect immunofluorescence
Source: publisher site journal article supplement (doi:10.1515/cclm-2018-0933), 2019-01-06
Supplement: Supplementary file 1 [file cclm-2018-0933_suppl.zip]

**Supplemental data Table 2.** **Total imprecision of the different iQC materials analyzed (n=20) on the QUANTA-Lyser - NOVA View® system in accordance to the CLSI EP5-A2 (15).**

| n=20 | **Negative kit iQCa (LIUb)c** | **Positive kit iQCa (LIUb)** | **Negative sample iQCa (LIUb)** | **Positive sample iQCa speckled (LIUb)** | **Positive sample iQCa homogeneous (LIUb)** |
| --- | --- | --- | --- | --- | --- |
| **Mean** | 0 | 2133.4 | 13.9 | 189.4 | 264.8 |
| **Standard deviation** | 0 | 658.0 | 5.2 | 51.4 | 68.2 |
| **Coefficient of variation (%)** | **-** | **30.8%** | **37.2%** | **27.1%** | **25.7%** |

aiQC, internal quality control; bLIU, light intensity units. cThere was no total imprecision result obtained for the negative kit iQC, as this material only generated a fluorescence intensity of ‘0’
